# Supplementary material for: New biological properties of coffee melanoidins
Source: Royal Society of Chemistry journal article supplement (doi:10.1039/c3fo60025d), 2013-01-01
Supplement: c3fo60025d.pdf [file c3fo60025d.pdf]

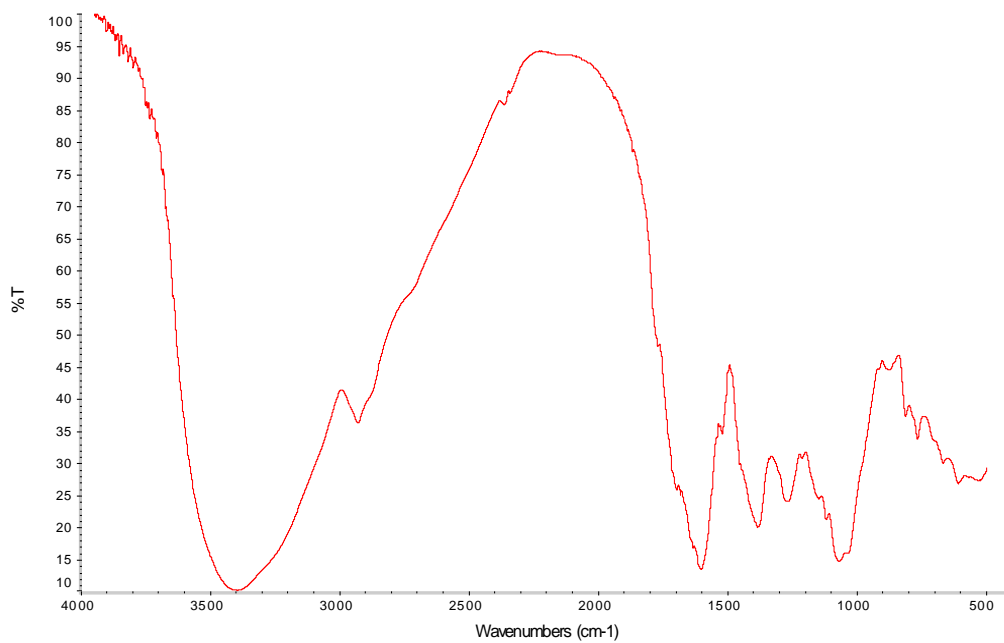

FTIR spectrum of coffee melanoidins in KBr

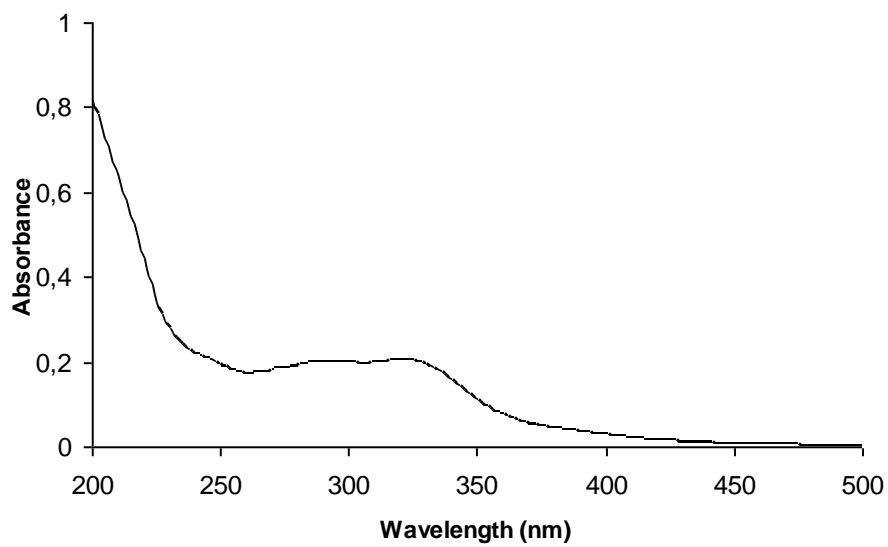

UV-VIS spectrum of coffee melanoidins in distilled water (0.025 mg/ml)
